# Supplementary material for: Studies on the Application of Polyimidobenzimidazole Based Nanofiber Material as the Separation Membrane of Lithium-Ion Battery
Source: MDPI journal article supplement (doi:10.3390/polym15081954), 2023-04-20
Supplement: s1 [file s1]

## Supplementary Materials

# Studies on the Application of Polyimidobenzimidazole Based Nanofiber Material as the Separation Membrane of Lithium-Ion Battery

Yu-Hsiang Lu <sup>1,†</sup>, Yu-Chang Huang <sup>2,†</sup>, Yen-Zen Wang <sup>1,\*</sup> and Ko-Shan Ho <sup>2,\*</sup>

<sup>1</sup> Department of Chemical and Materials Engineering, National Yu-Lin University of Science & Technology, 123, Sec. 3, University Rd., Dou-Liu City Yu-Lin, 64301, Taiwan; jerrylyu34@gmail.com

<sup>2</sup> Department of Chemical and Materials Engineering, National Kaohsiung University of Science and Technology, 415, Chien-Kuo Road, Kaohsiung 80782, Taiwan; ych@nkust.edu.tw

\* Correspondence: wangzen@yuntech.edu.tw (Y.-Z.W.); hks@nkust.edu.tw (K.-S.H.)

† These authors contributed equally to this work.

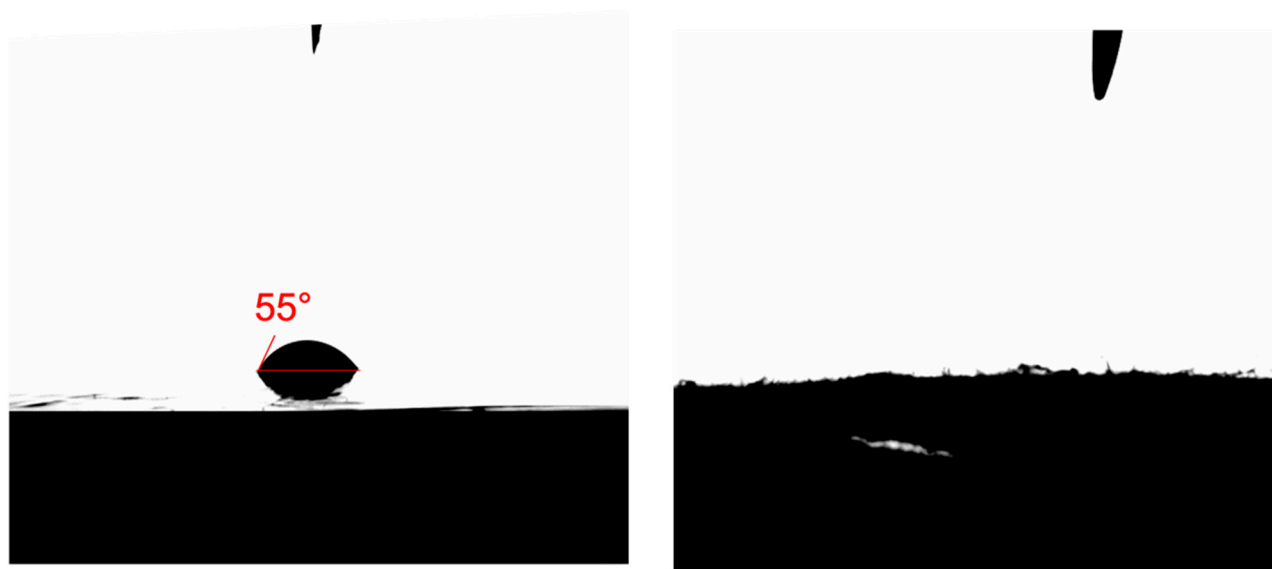

**Figure S1.** Contact angles of (a) Celgard H1612 (b) BI-PI with electrolytes.

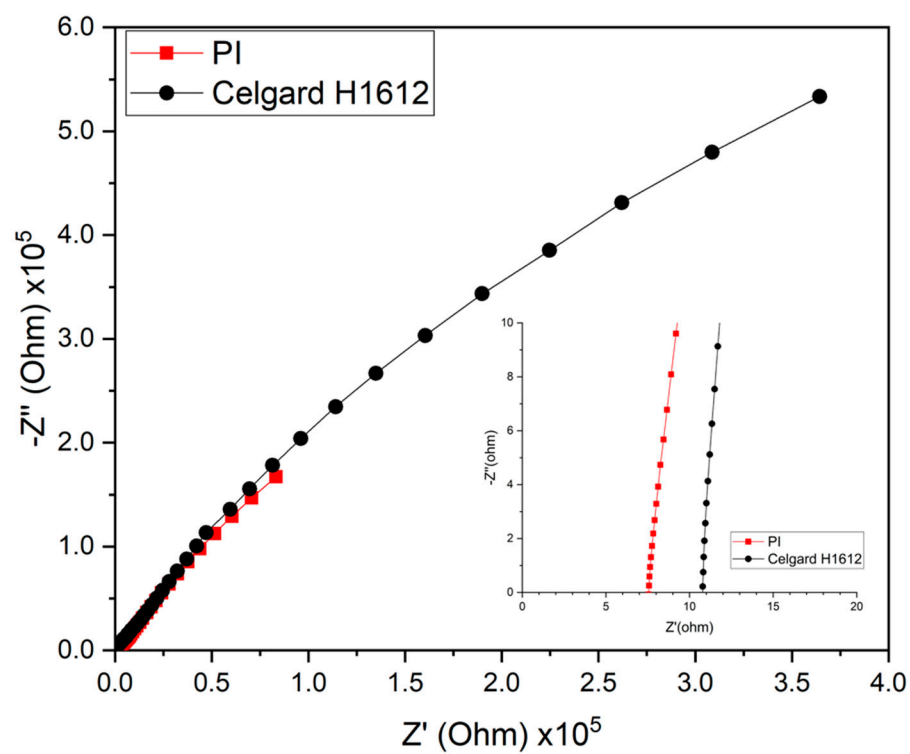

Figure S2. EIS curves obtained in SS/ Separator/ SS system.

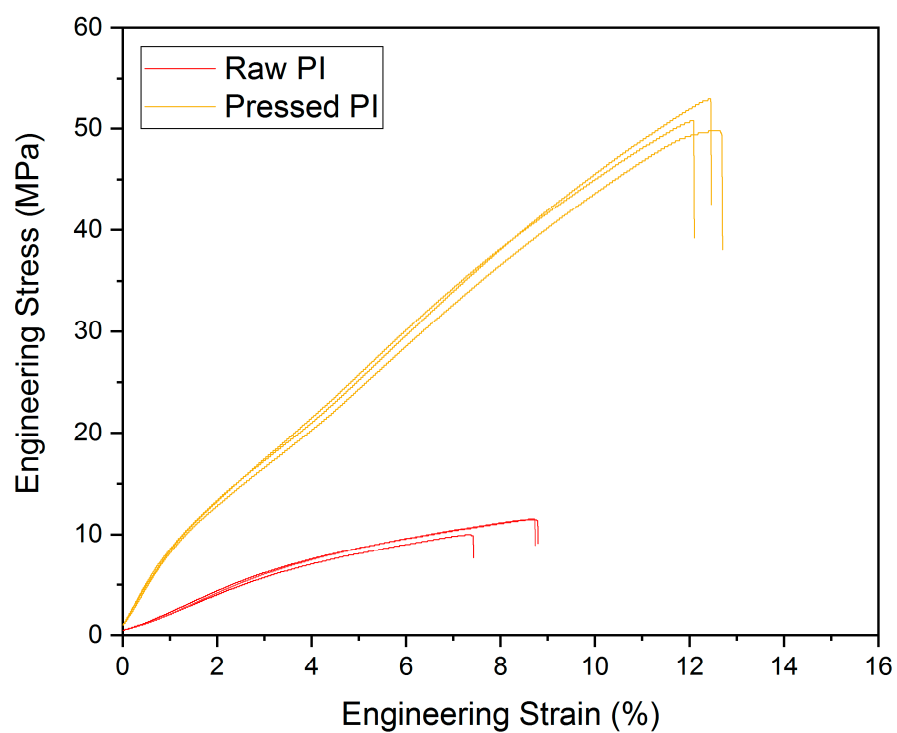

Figure S3. Stress-strain curves of hot-pressed and non hot-pressed films.
